# Supplementary material for: Multifunctional wettability patterns prepared by laser processing on superhydrophobic TiO2nanostructured surfaces
Source: Royal Society of Chemistry journal article supplement (doi:10.1039/c4tb01814a), 2014-11-21
Supplement: c4tb01814a1.pdf [file c4tb01814a1.pdf]

## *Supporting Information*

### **Multifunctional wettability patterns prepared by laser processing on superhydrophobic TiO<sub>2</sub> nanostructured surfaces**

*Huaqiong Li,<sup>‡b</sup> Yuekun Lai,<sup>‡\*a</sup> Jianying Huang,<sup>a</sup> Yuxin Tang,<sup>b</sup> Lei Yang,<sup>c</sup> Zhong Chen,<sup>b</sup> Keqin Zhang,<sup>a</sup> Xincai Wang<sup>d</sup> and Lay Poh Tan<sup>\*b</sup>*

*<sup>a</sup>National Engineering Laboratory of Modern Silk, College of Textile and Clothing Engineering, Soochow University, Suzhou 215123, PR China*

*<sup>b</sup>School of Materials Science and Engineering, Nanyang Technological University, 50 Nanyang Avenue, 639798 Singapore, Singapore.*

*<sup>c</sup>Institute of Orthopaedics and Department of Orthopaedic Surgery of First Affiliated Hospital, Soochow University, Suzhou 215006, P.R. China.*

*<sup>d</sup>Singapore Institute of Manufacturing Technology, 71 Nanyang Drive, 638075, Singapore.  
Email: yklai@suda.edu.cn; lptan@ntu.edu.sg*

### **Supporting movie and figure captions:**

**Movie S1.** Droplet transportation along the guiding track constructed by taking advantage of wettability micropattern with extremely high adhesion contrast.

**Figure S1.** Experimental set-up of the fs-laser irradiation facility with the scanning unit of the sample holders (scanner and xyz-stage).

**Figure S2.** SEM images of direct femtosecond laser induced micropatterns with various shapes and sizes on biodegradable polymer substrates.

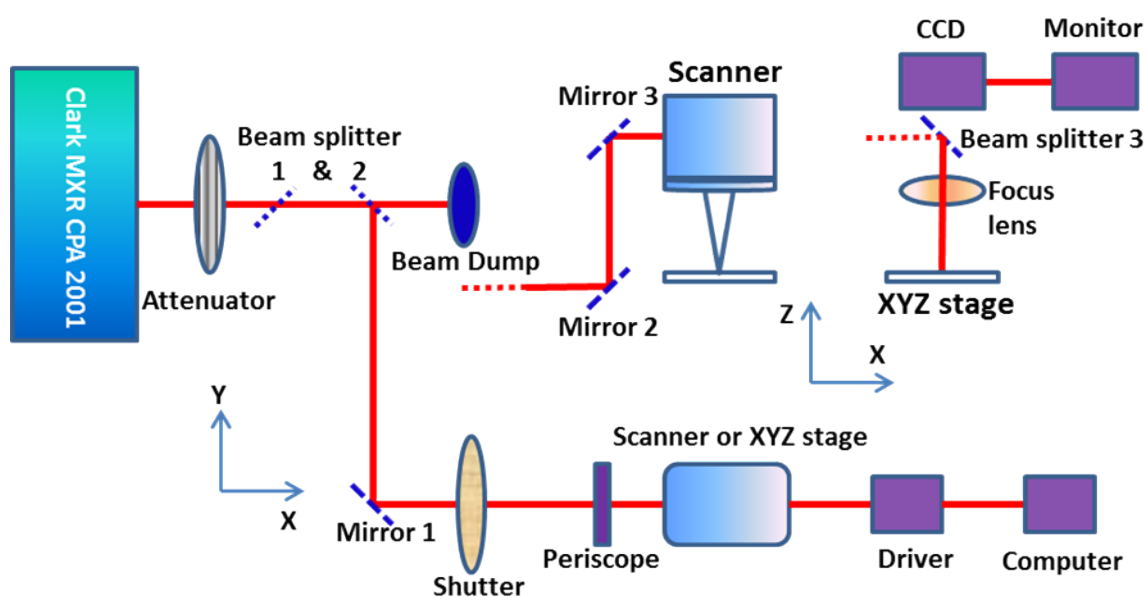

**Figure S1.** Experimental set-up of the fs-laser irradiation facility with the scanning unit of the sample holders (scanner and xyz-stage).

Direct femtosecond laser micropatterning offers distinct advantages for patterning compared to traditional photolithography techniques in terms of fast and simple process, large scale production and ease of operation. With one-step laser processing, the patterning can be applied to various materials with any shape. Here shows some examples that illustrated different kinds of micro-patterns (triangles, squares or circles), which were created by direct femtosecond laser machining on biodegradable polymer substrates.

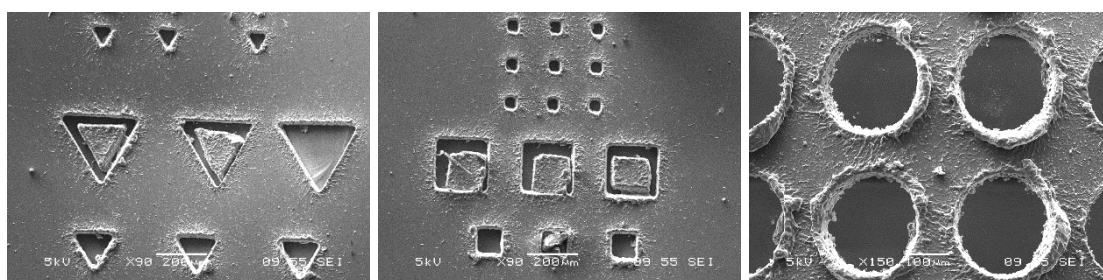

**Figure S2.** SEM images of direct femtosecond laser induced micropatterns with various shapes and sizes on biodegradable polymer substrates.
